# Supplementary material for: Graphdiyne–hemin-mediated catalytic system for wound disinfection and accelerated wound healing
Source: Royal Society of Chemistry journal article supplement (doi:10.1039/d1qm00490e), 2021-01-01
Supplement: d1qm00490e1.pdf [file d1qm00490e1.pdf]

## Supporting Information

### Graphdiyne-Hemin Mediated Catalytic System for Wound Disinfection and Accelerated Wound Healing

Arbab Ali, ‡<sup>ab</sup> Jiaming Liu, ‡<sup>b</sup> Huige Zhou,<sup>b</sup> Tao Liu,<sup>b</sup> Muhammad Ovais,<sup>b</sup> Huibiao Liu,<sup>c</sup> Yukui Rui,<sup>\*a</sup> and Chunying Chen<sup>\*b</sup>

<sup>a</sup> Beijing Key Laboratory of Farmland Soil Pollution Prevention and Remediation, College of Resources and Environmental Sciences, China Agricultural University, Beijing 100193, China

<sup>b</sup> CAS Key Laboratory for Biomedical Effects of Nanomaterials and Nanosafety & CAS Center for Excellence in Nanoscience, National Center for Nanoscience and Technology of China, Beijing 100190, China. E-mail: ruiyukui@163.com; chenchy@nanoctr.cn

<sup>c</sup> CAS Key Laboratory of Organic Solids, Beijing National Laboratory for Molecular Sciences, CAS Research/Education Center for Excellence in Molecular Sciences, Institute of Chemistry, Chinese Academy of Sciences, Beijing 100190, China

‡These authors contributed equally to this work.

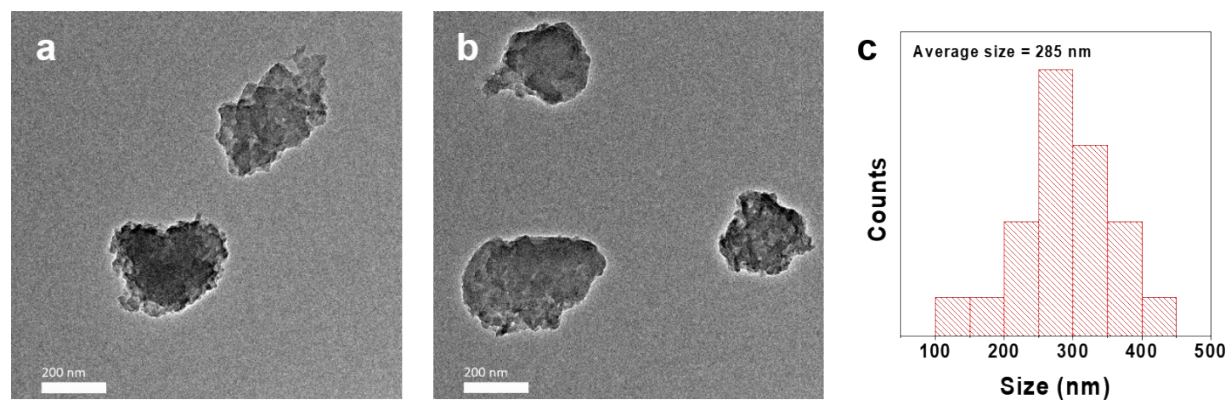

**Fig. S1** (a) TEM image of GDY. (b) TEM image of GDY-Hemin and (c) Statistical size distribution of GDY-Hemin.

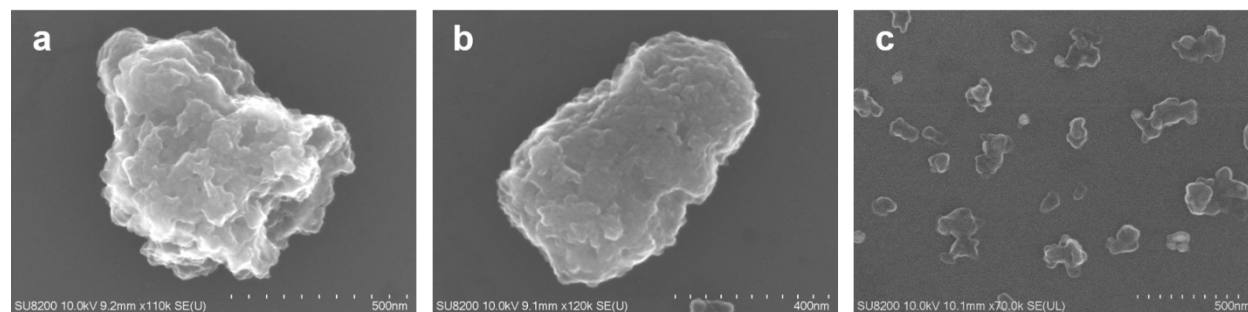

**Fig. S2** SEM images of (a) GDY and (b-c) GDY-Hemin.

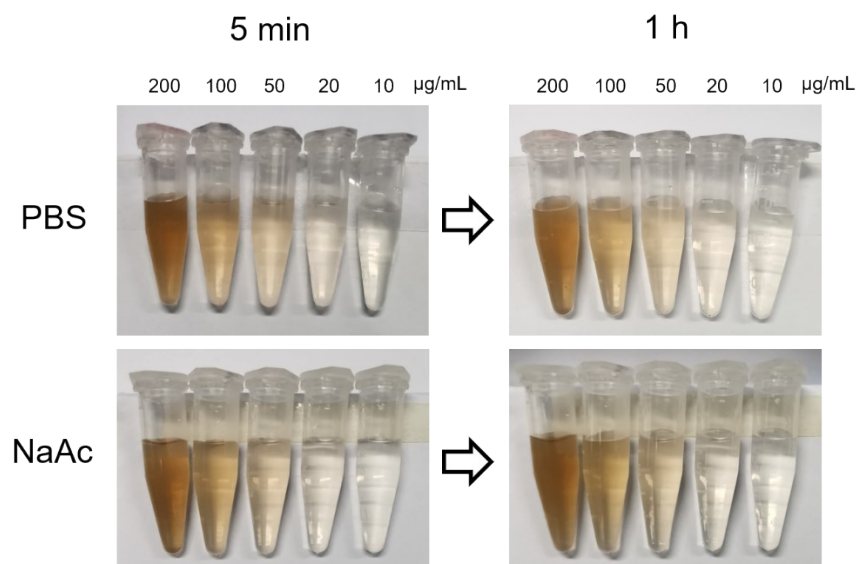

**Fig. S3** Images of GDY-Hemin dispersed in different buffer solution.

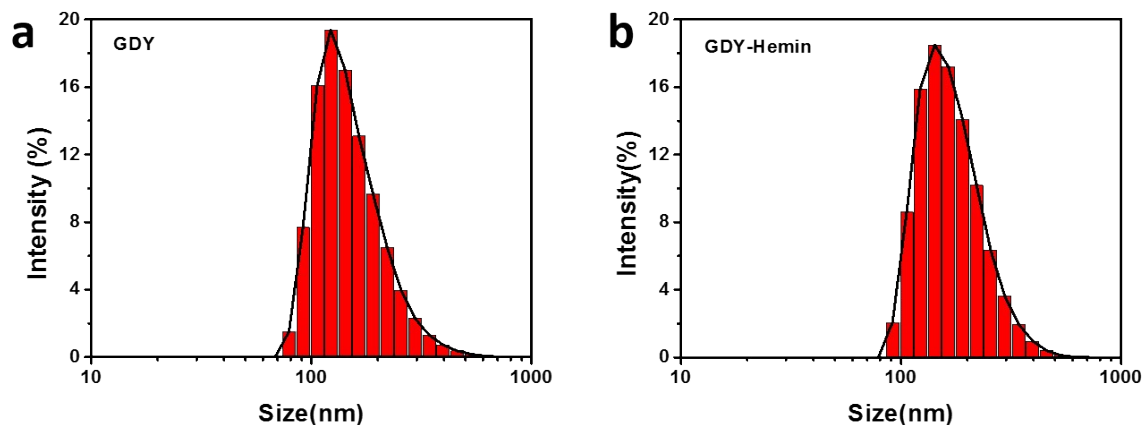

**Fig. S4** Hydrodynamic size distribution of (a) GDY and (b) GDY-Hemin.

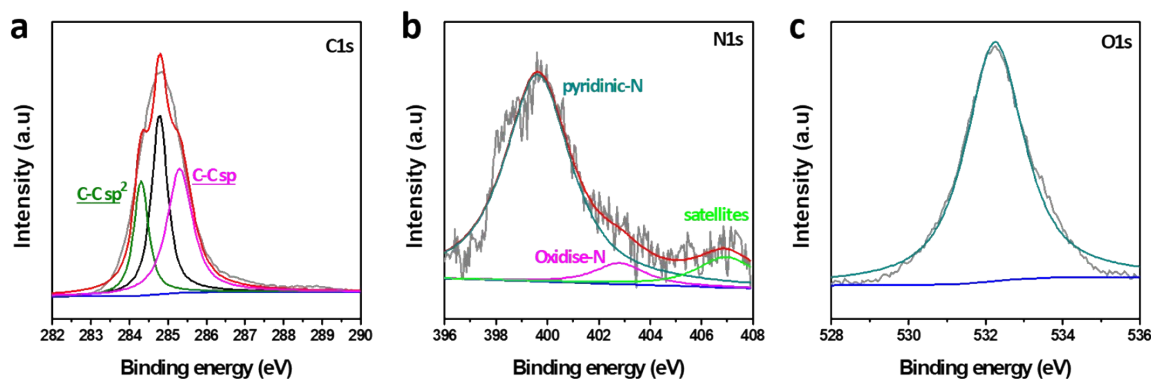

**Fig. S5** High resolution (a) C1s, (b) N1s, and (c) O1s XPS spectra of GDY-Hemin.

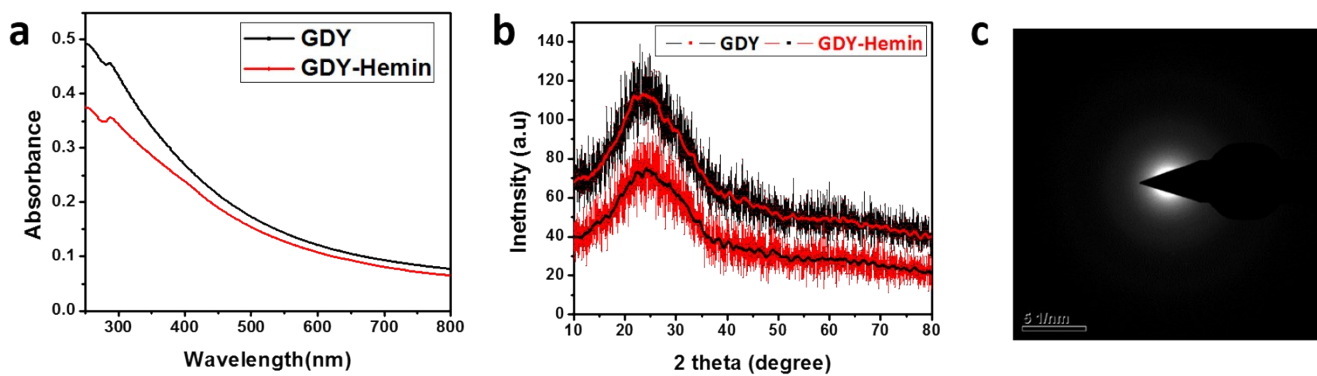

**Fig. S6** Characterization of GDY and GDY-Hemin. (a) UV-Vis spectra, (b) XRD spectra, (c) SAED pattern of GDY-hemin.

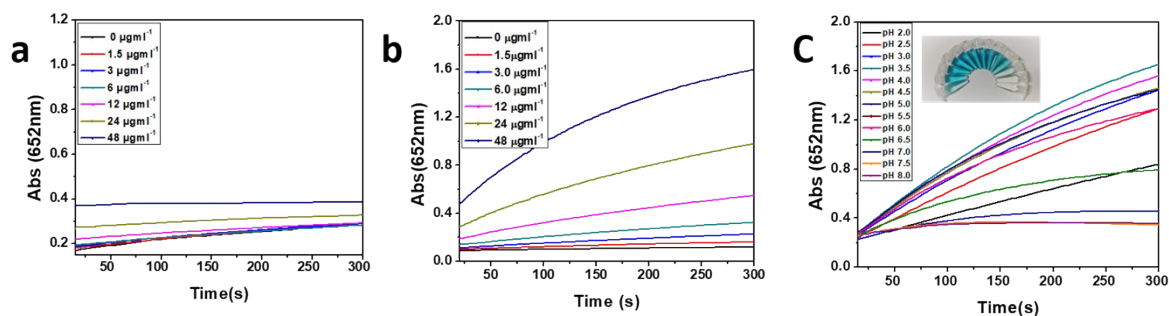

**Fig. S7** Time-dependent catalytic activity of GDY and GDY-Hemin with absorbance changes at 652 nm under different conditions. (a-b) Time dependent absorption changes at 652nm at different concentrations of GDY (a) and GDY-Hemin (b). The experiments were carried out under 40 mM  $\text{H}_2\text{O}_2$  with TMB as oxidizing substrate in sodium acetate buffer (50 mM, pH 4.0). (c) Time dependent absorption changes of GDY-Hemin (25  $\mu\text{g/mL}$ ) at 652nm under different pH conditions. The experiments were performed under 40 mM  $\text{H}_2\text{O}_2$  with TMB as oxidizing substrate in sodium acetate buffer (50 mM, pH 4.0).

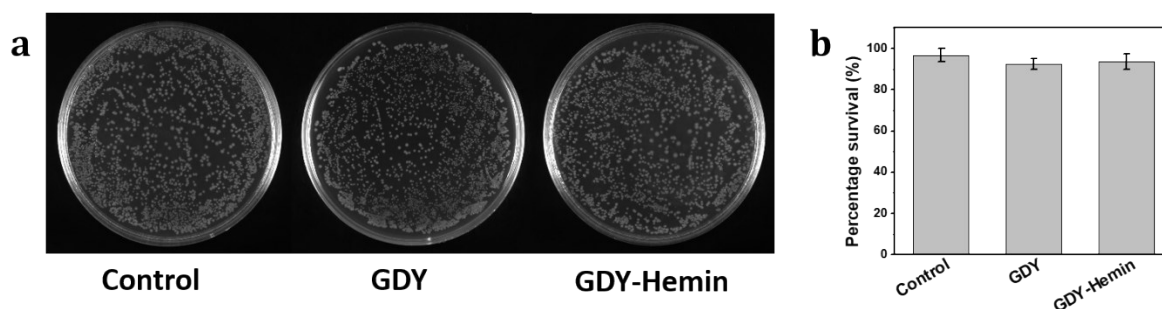

**Fig. S8** Initial in vitro antibacterial performance of GDY and GDY-Hemin in the absence of  $\text{H}_2\text{O}_2$ .

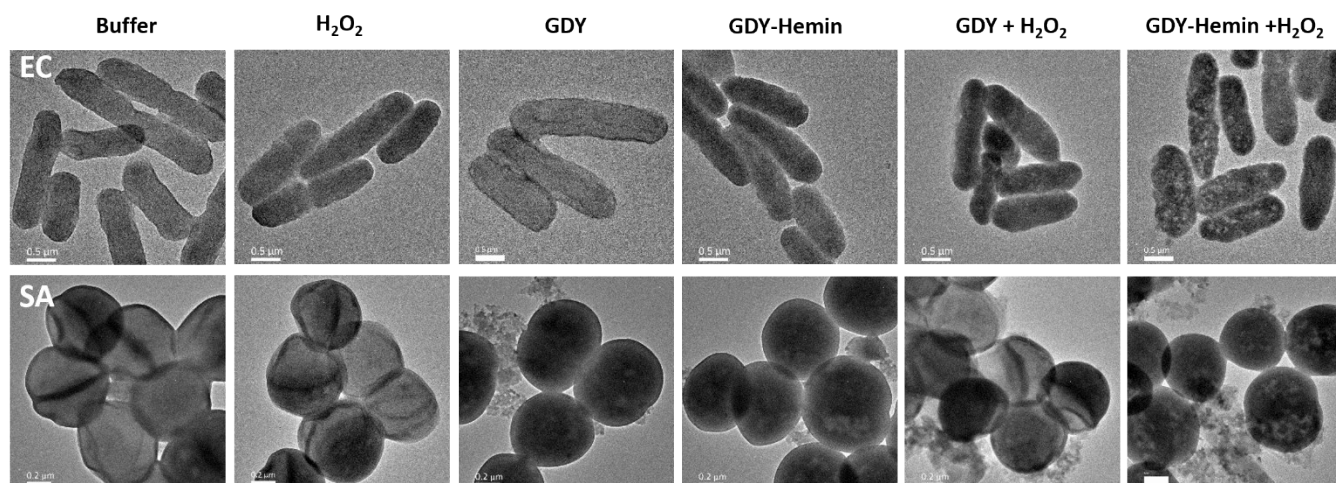

**Fig. S9** TEM micrographs of *E. coli* and *S. aureus* after upon different treatments.

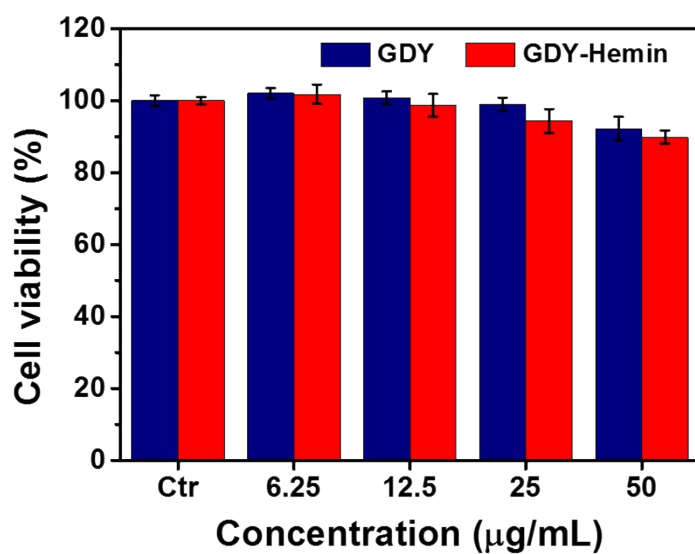

**Fig. S10** In vitro biocompatibility of GDY and GDY-Hemin. Cell viability of HUVEC cells after incubation with GDY or GDY-Hemin at different concentrations (6.25 to 100 μg/mL) for 48 hours. Data are presented as values of viable cells mean ± sd (n=3).



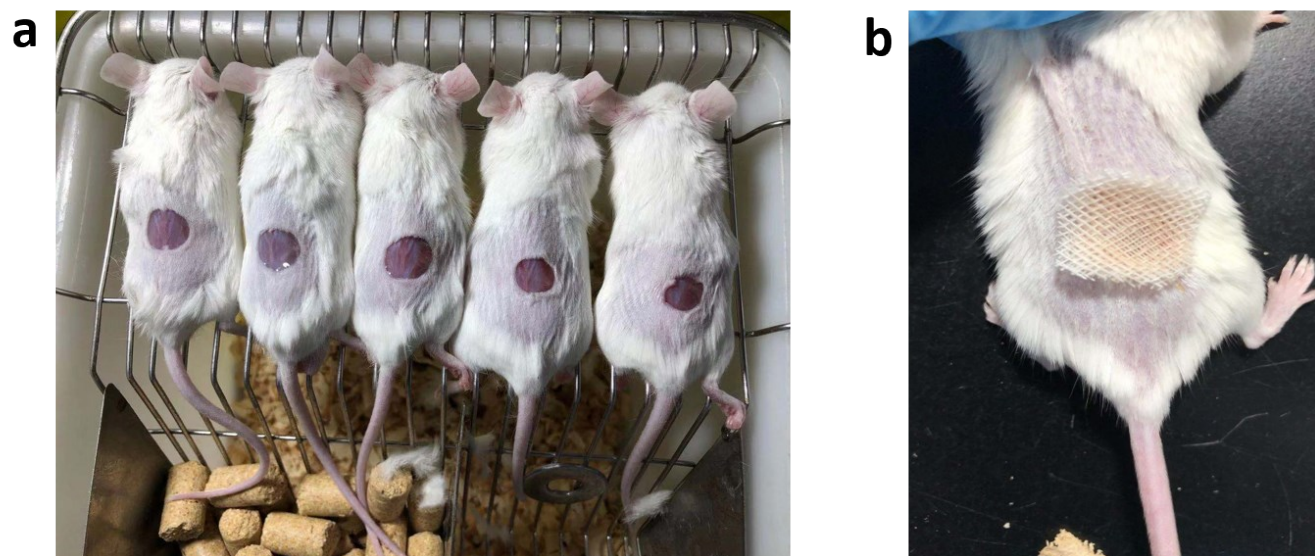

**Fig. S11** Photographs of mice (a) after wound incision and bacterial inoculation or (b) after treating and covering with gauze piece.

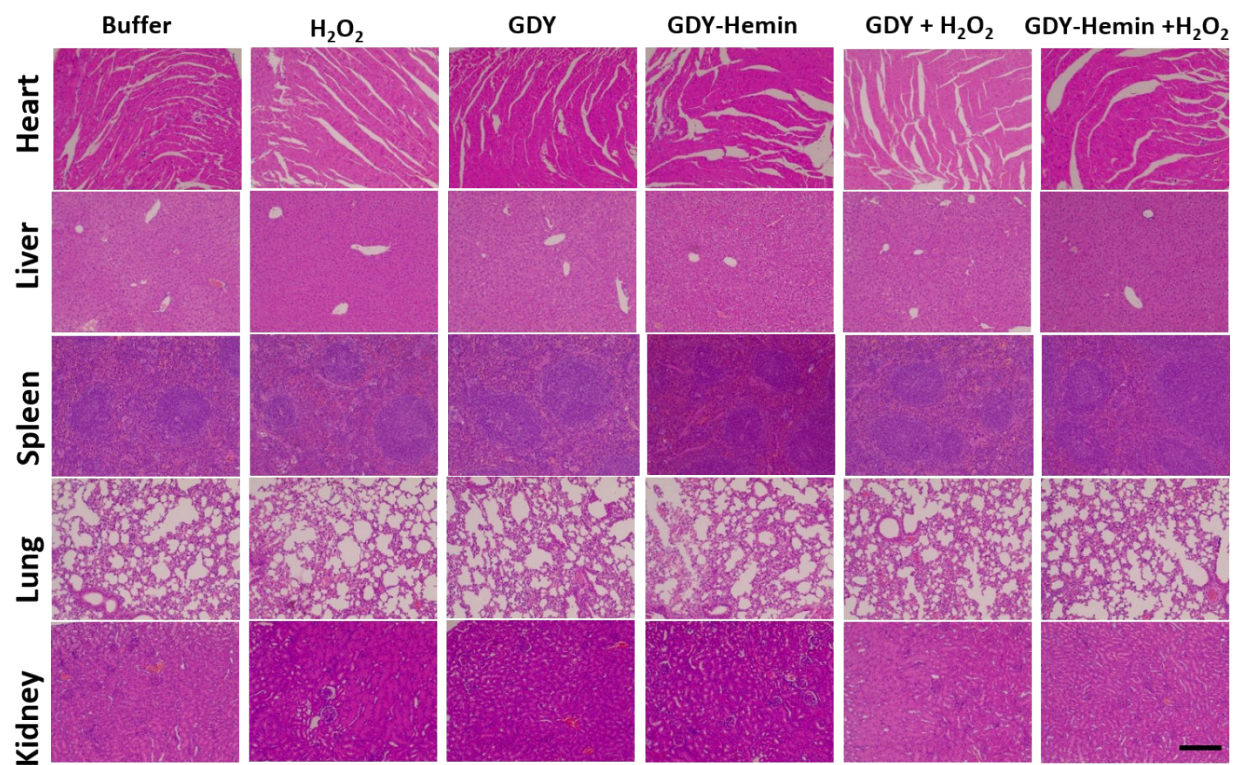

**Fig. S12** H&E staining images of major organs (heart, liver, spleen, kidney and lungs) of mice after complete treatment with topical application of different treatment formulations.
